# Supplementary material for: Hematopoietic stem and progenitor cell-restricted Cdx2 expression induces transformation to myelodysplasia and acute leukemia
Source: PubMed Central journal article supplement (PMC7296000; doi:10.1038/s41467-020-16840-2), 2020-06-15

## Supplementary Data 1 - Uncropped original scans

### Supplementary Figure 1c

mouse anti-Cdx2 (CDX-88, 1:1000)

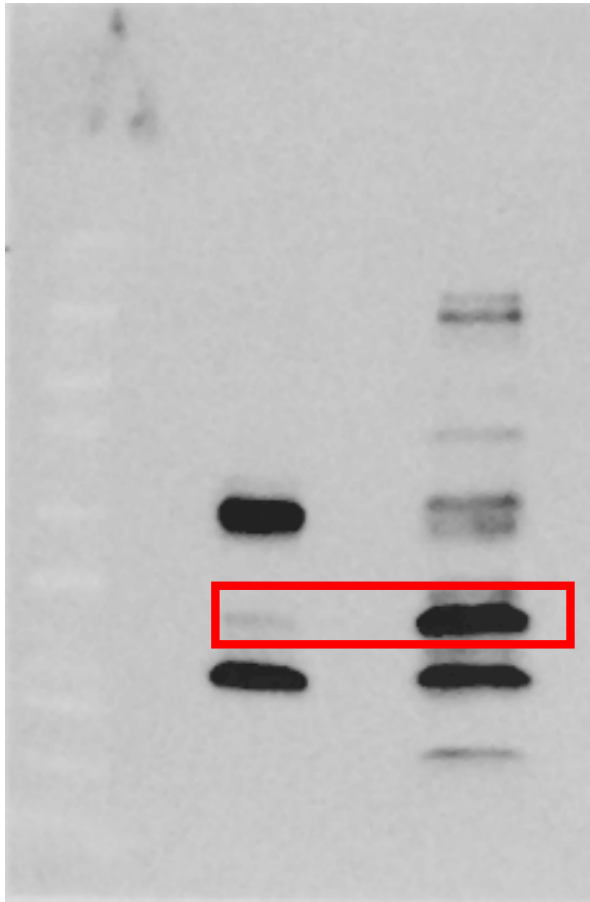

mouse anti- $\beta$ -Actin (1:5000)

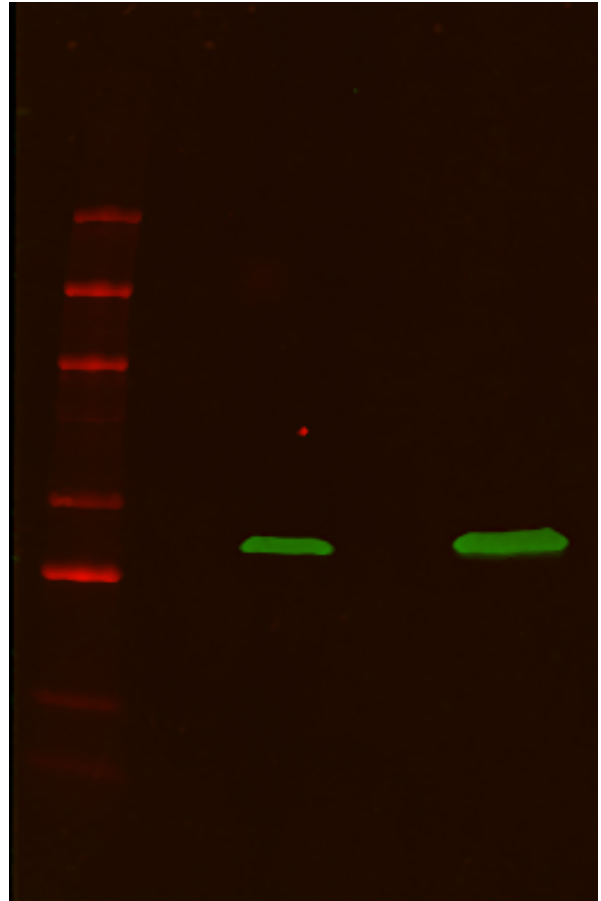

mouse anti- $\beta$ -Actin (1:5000)

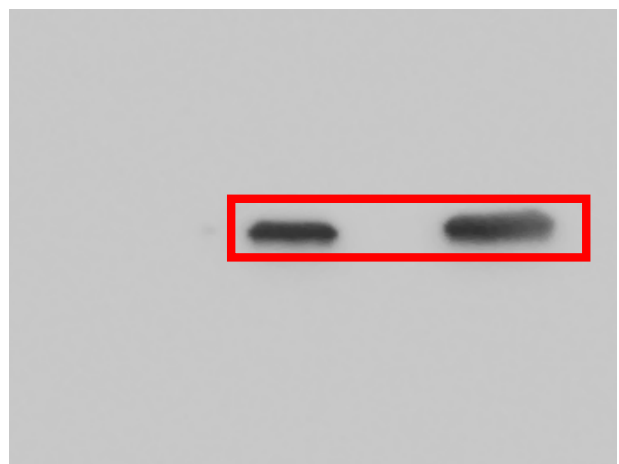

Supplementary Figure 6a

mouse anti-Flag ( 1:1000)

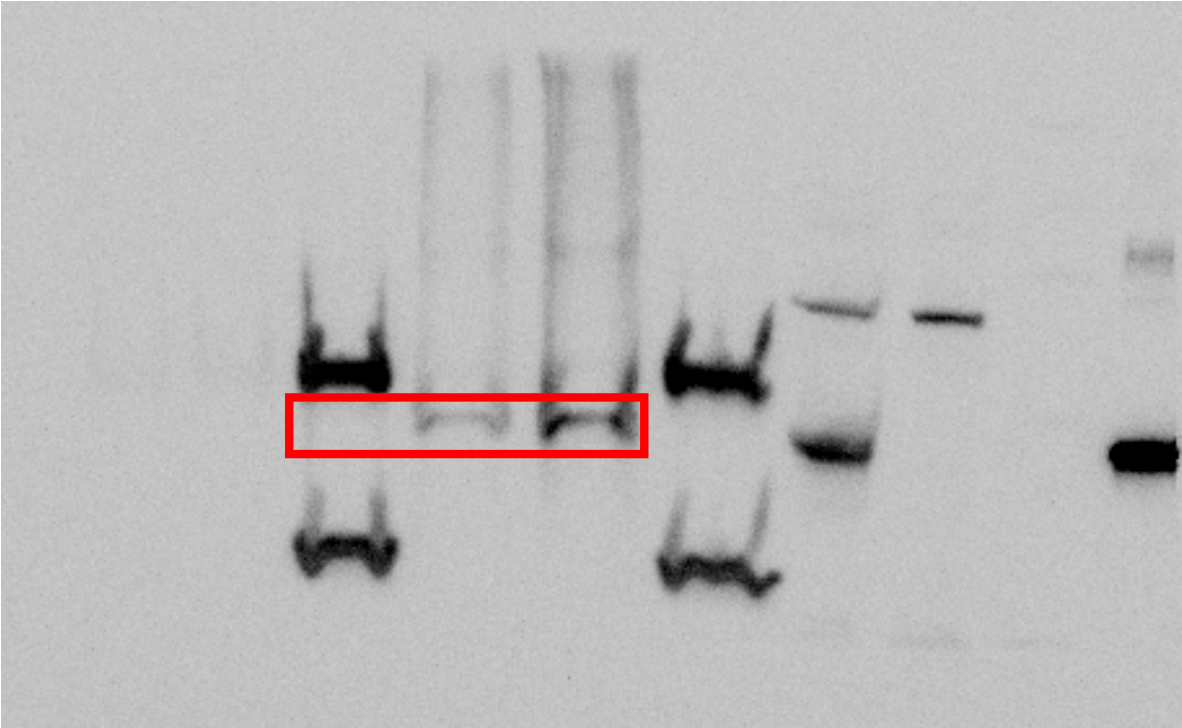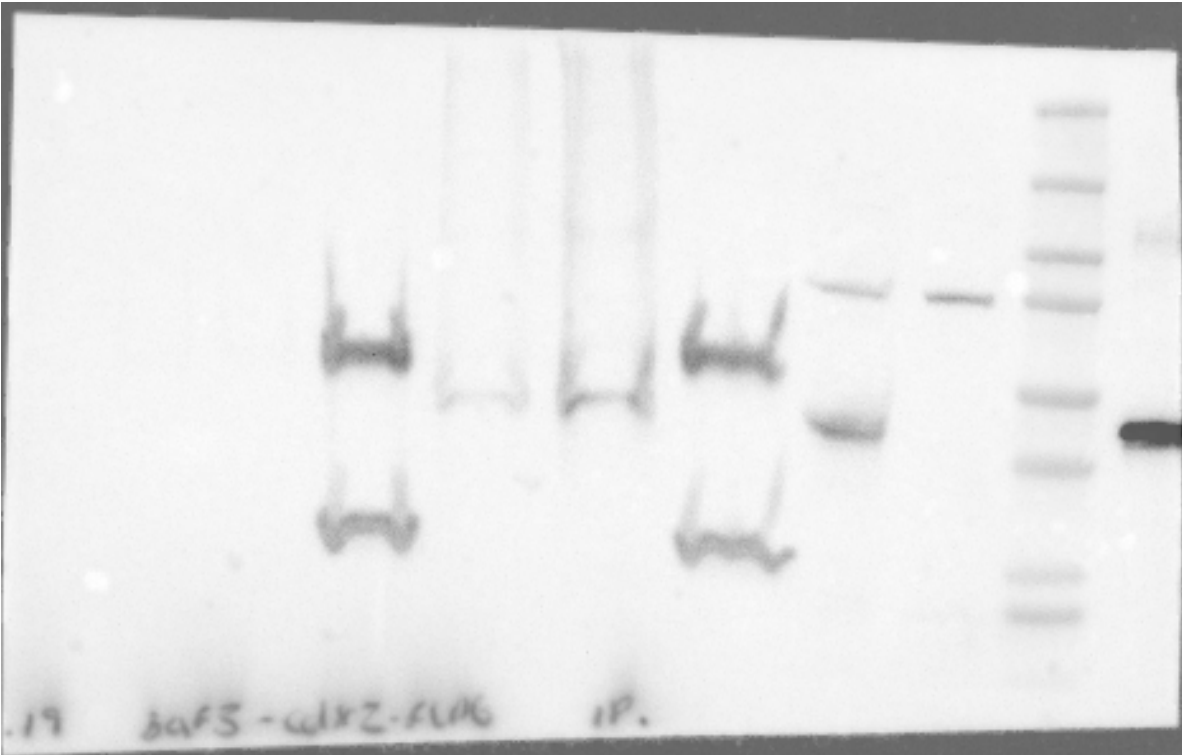

Supplement: 41467_2020_16840_MOESM9_ESM.pdf [file 41467_2020_16840_MOESM9_ESM.pdf]
